# Supplementary material for: Confinement width and inflow-to-sediment discharge ratio control the morphology and braiding intensity of submarine channels: insights from physical experiments and reduced-complexity models
Source: Copernicus journal article supplement (doi:10.5194/esurf-11-615-2023), 2023-07-19
Supplement: Supplementary file 1 [file esurf-11-615-2023-supplement.pdf]

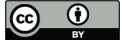

*Supplement of*

**Confinement width and inflow-to-sediment discharge ratio control the morphology and braiding intensity of submarine channels: insights from physical experiments and reduced-complexity models**

**Sam Y. J. Huang et al.**

*Correspondence to:* Steven Y. J. Lai ([stevenyjlai@mail.ncku.edu.tw](mailto:stevenyjlai@mail.ncku.edu.tw))

The copyright of individual parts of the supplement might differ from the article licence.

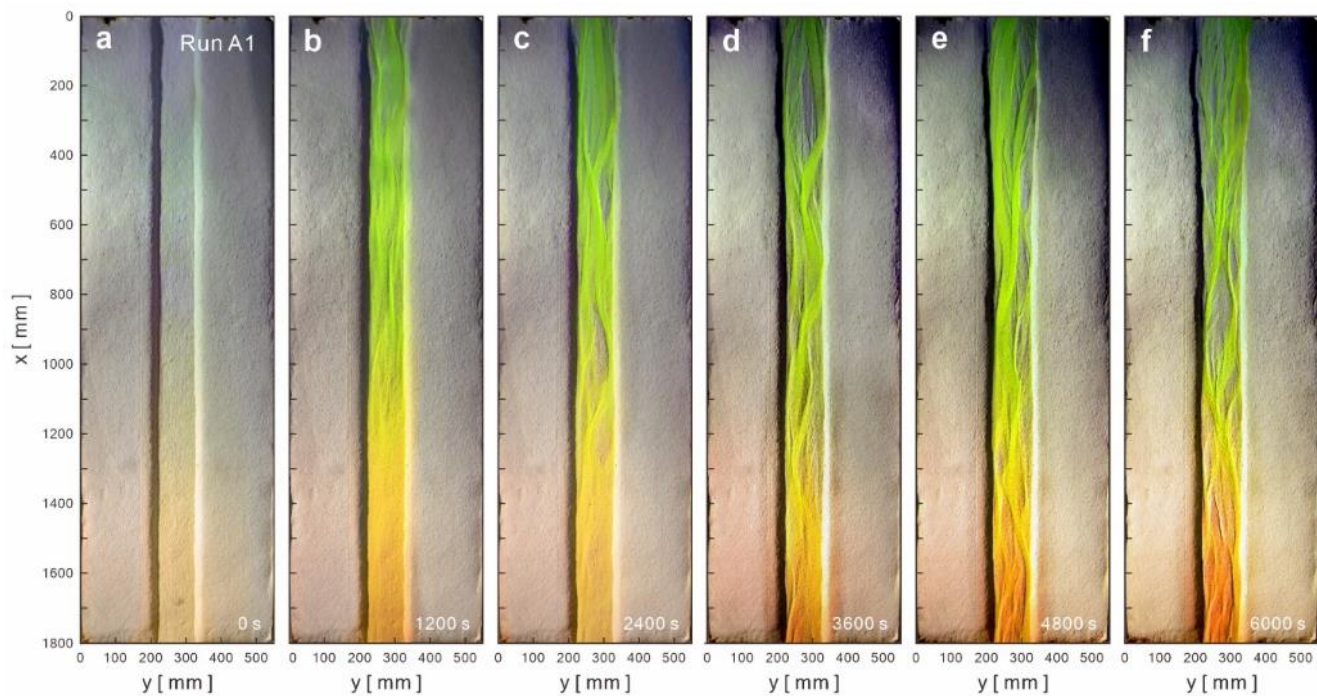

Figure S1. Orthophotos of Run A1 from  $t = 0$  to 100 min.

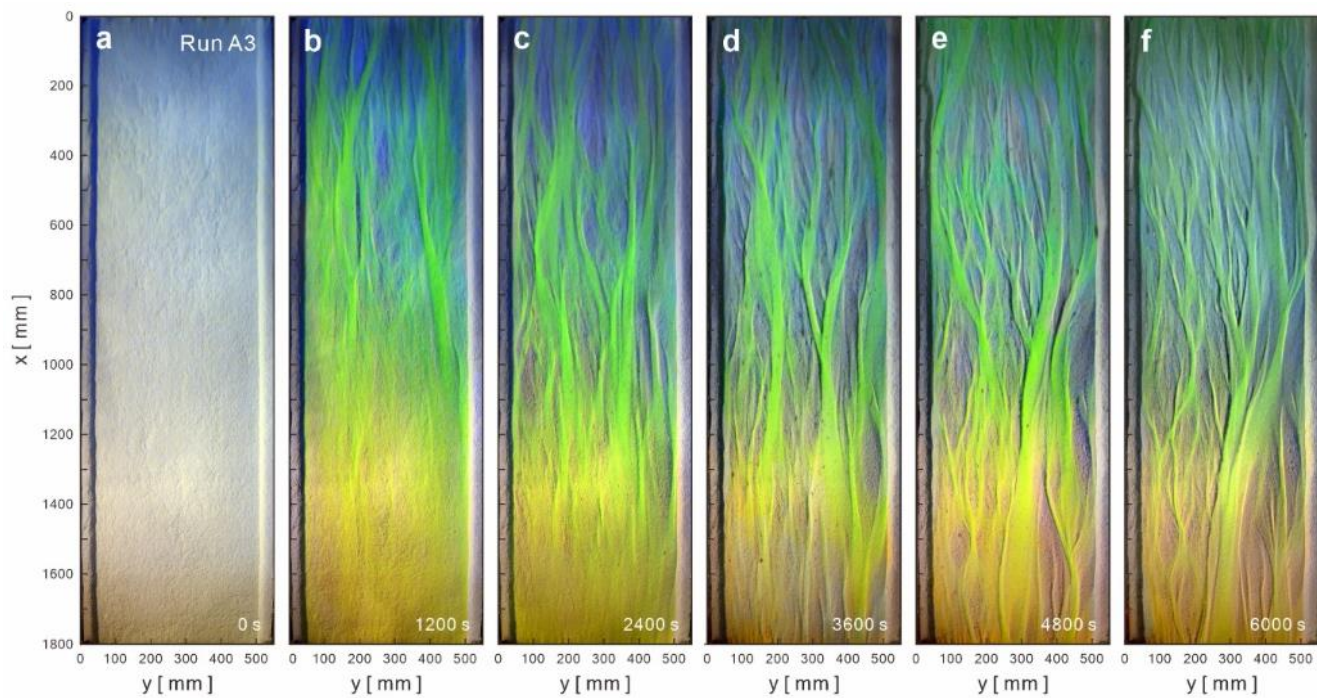

Figure S2. Orthophotos of Run A3 from  $t = 0$  to 100 min.

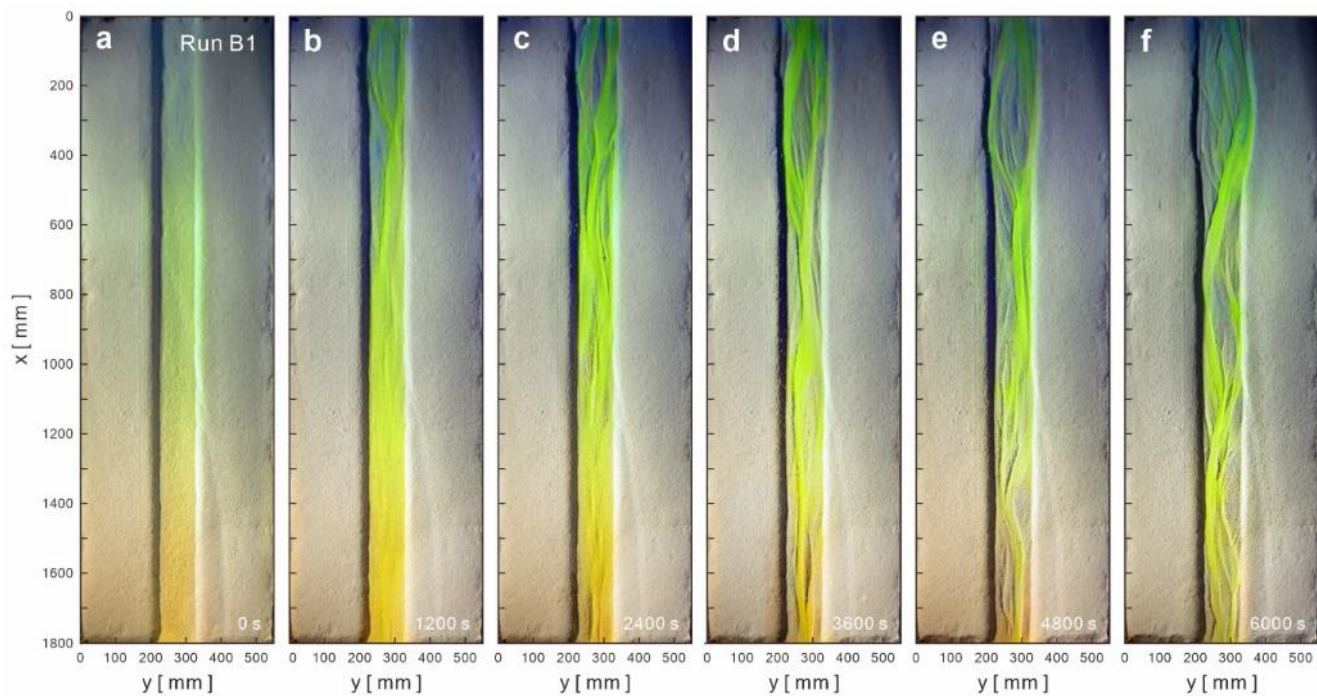

Figure S3. Orthophotos of Run B1 from  $t = 0$  to 100 min.

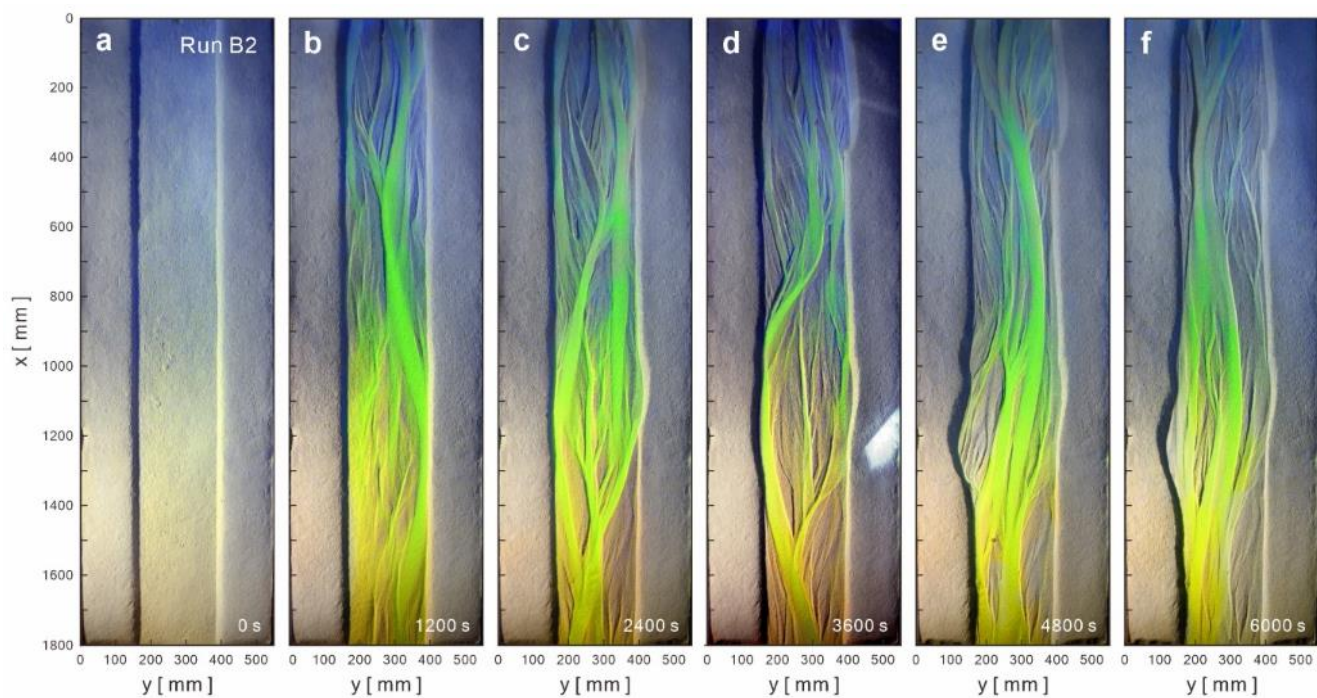

Figure S4. Orthophotos of Run B2 from  $t = 0$  to 100 min.

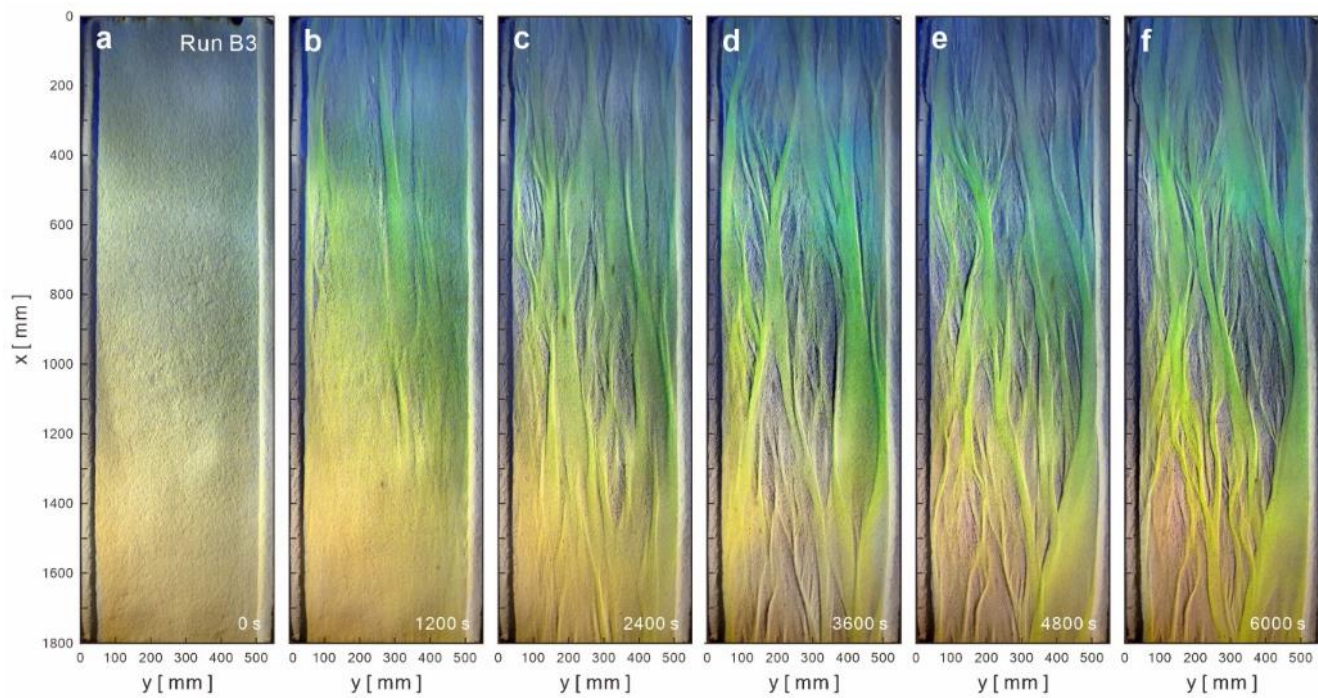

**Figure S5. Orthophotos of Run B3 from  $t = 0$  to 100 min.**

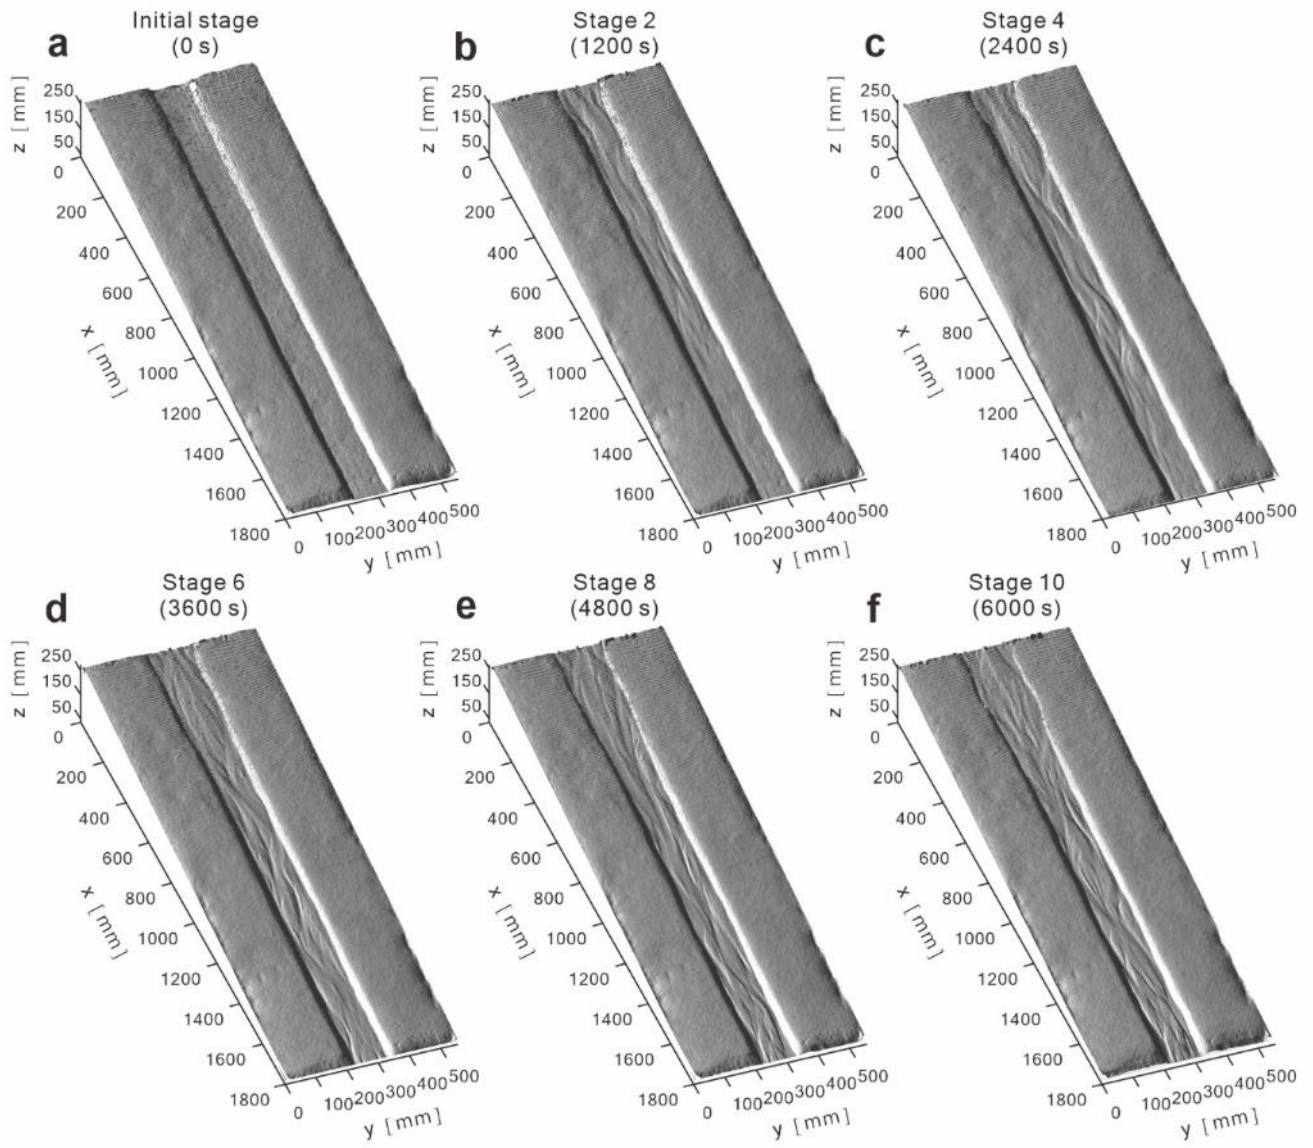

**Figure S6. Hillshaded DEMs of Run A1 from  $t = 0$  to 100 min.**

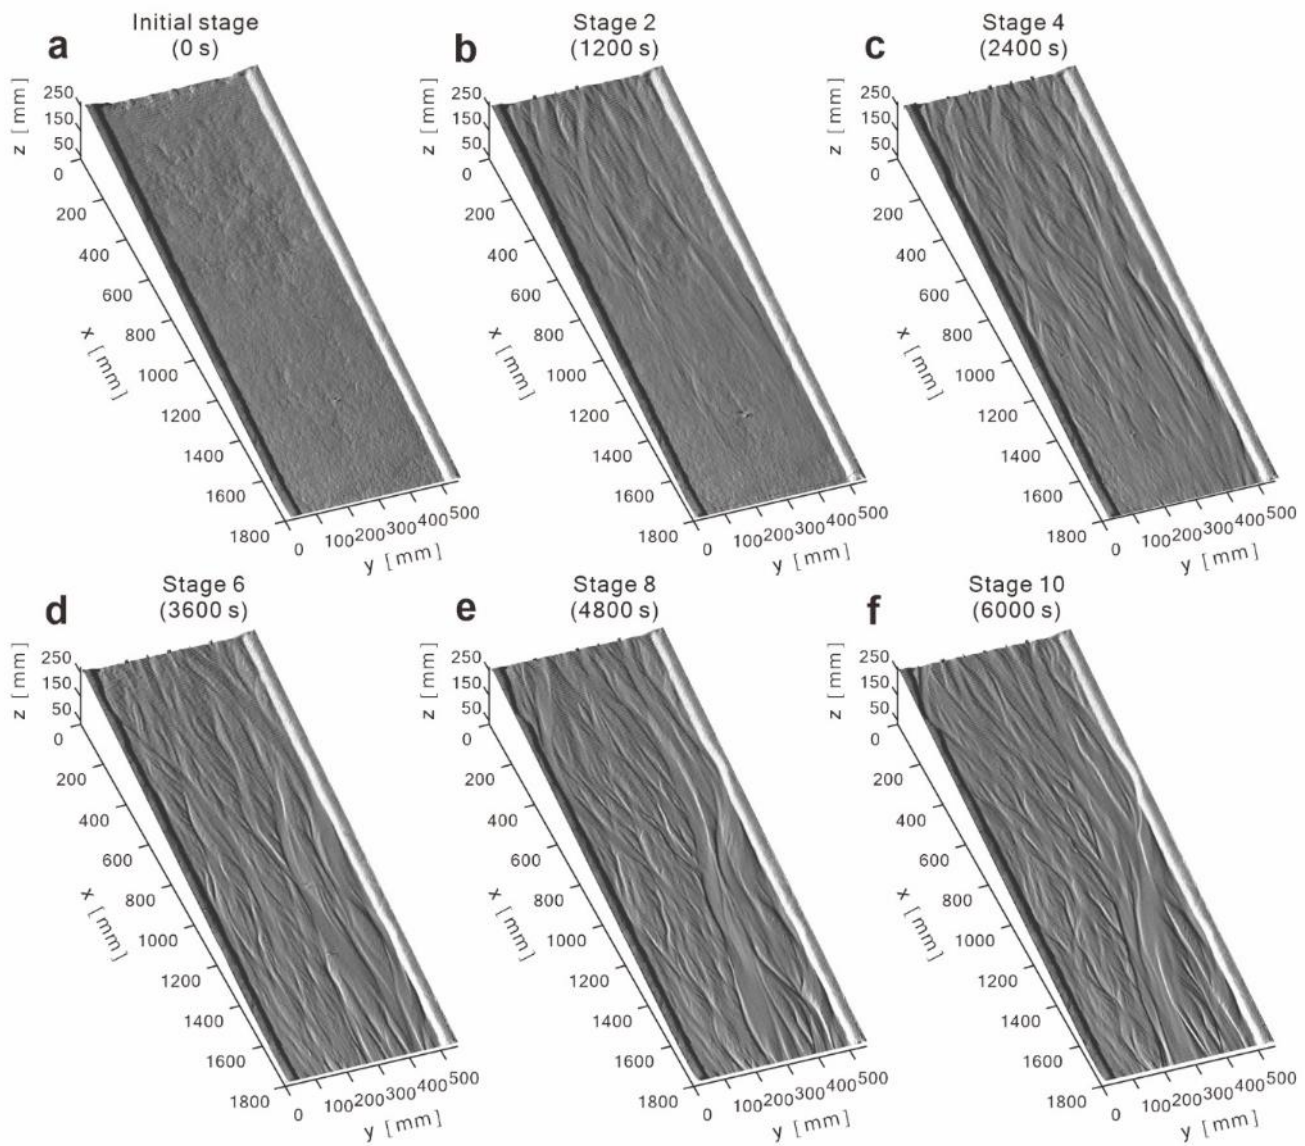

**Figure S7. Hillshaded DEMs of Run A3 from  $t = 0$  to 100 min.**

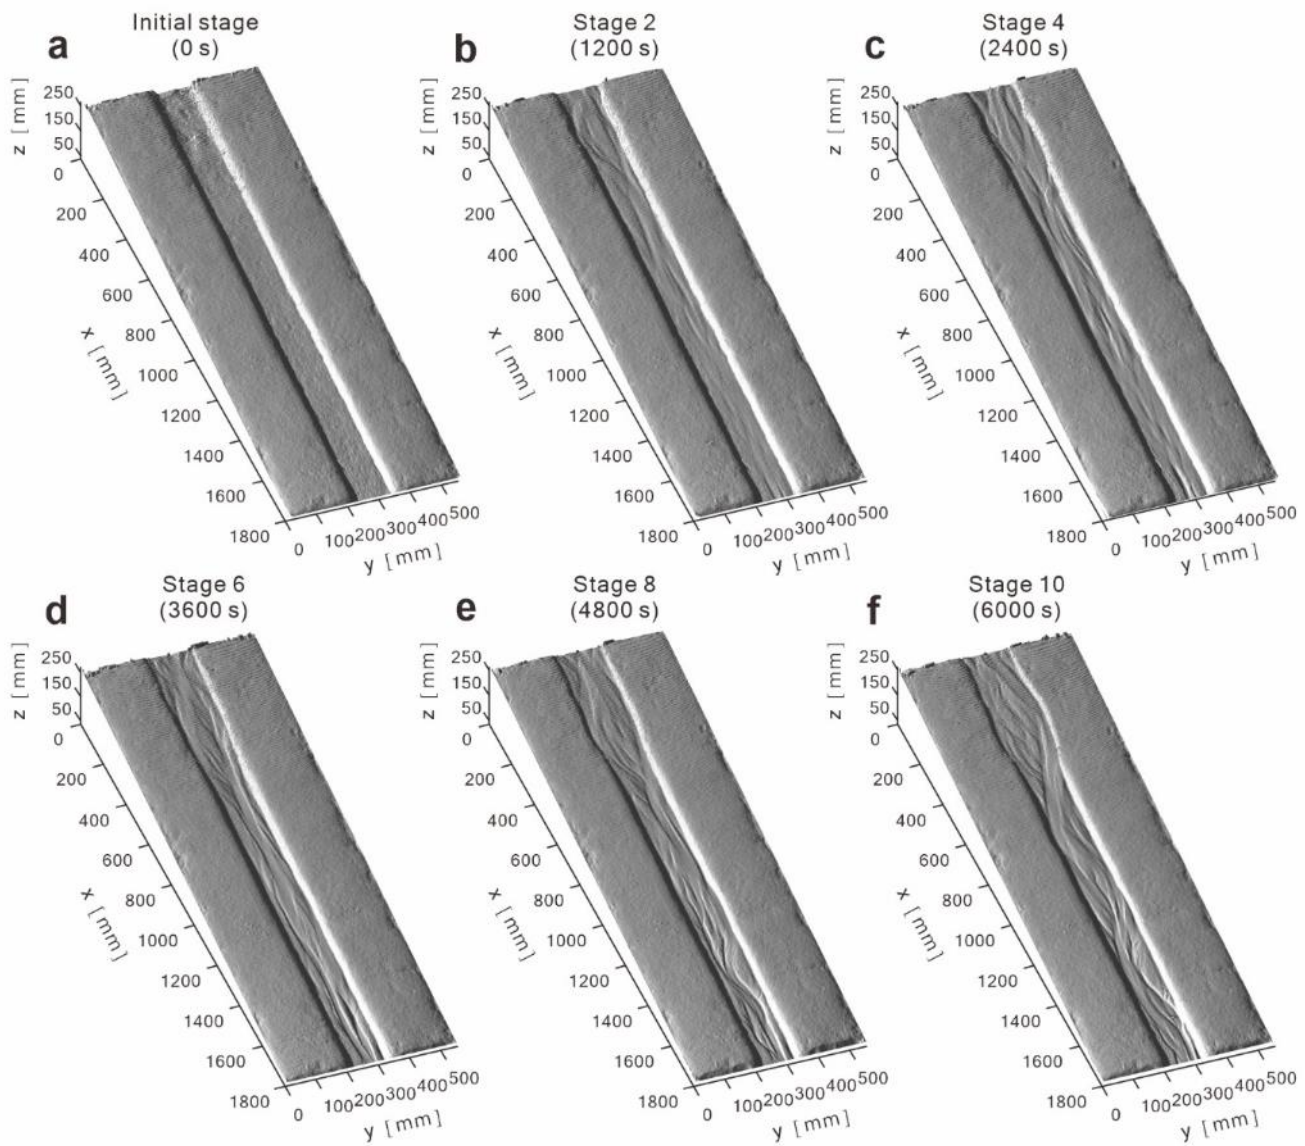

**Figure S8. Hillshaded DEMs of Run B1 from  $t = 0$  to 100 min.**

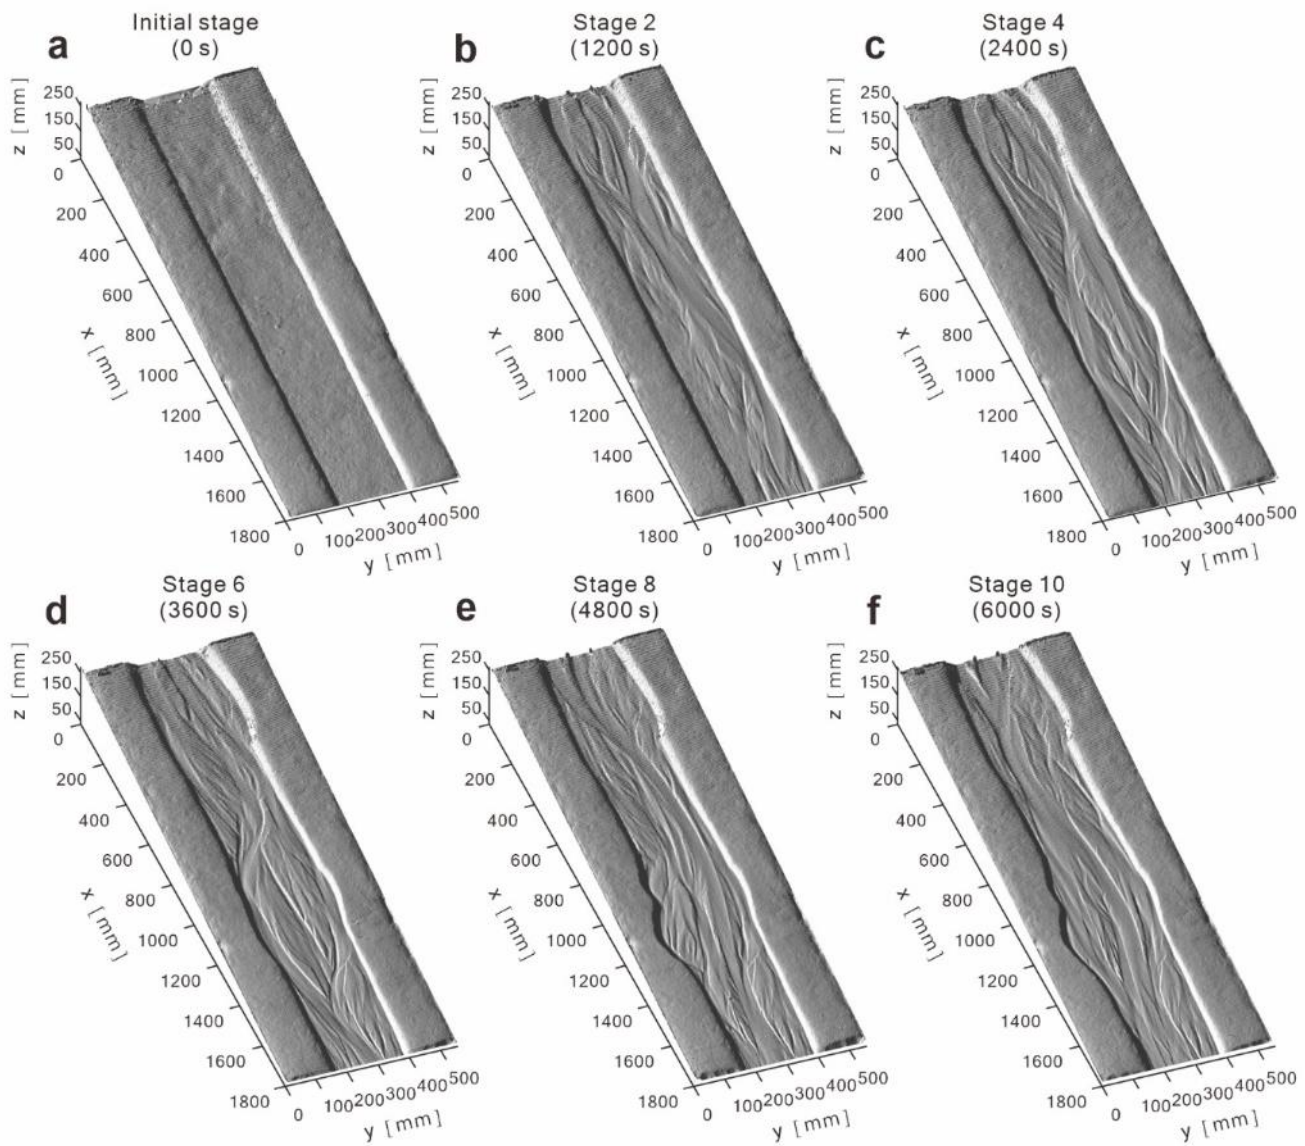

**Figure S9. Hillshaded DEMs of Run B2 from  $t = 0$  to 100 min.**



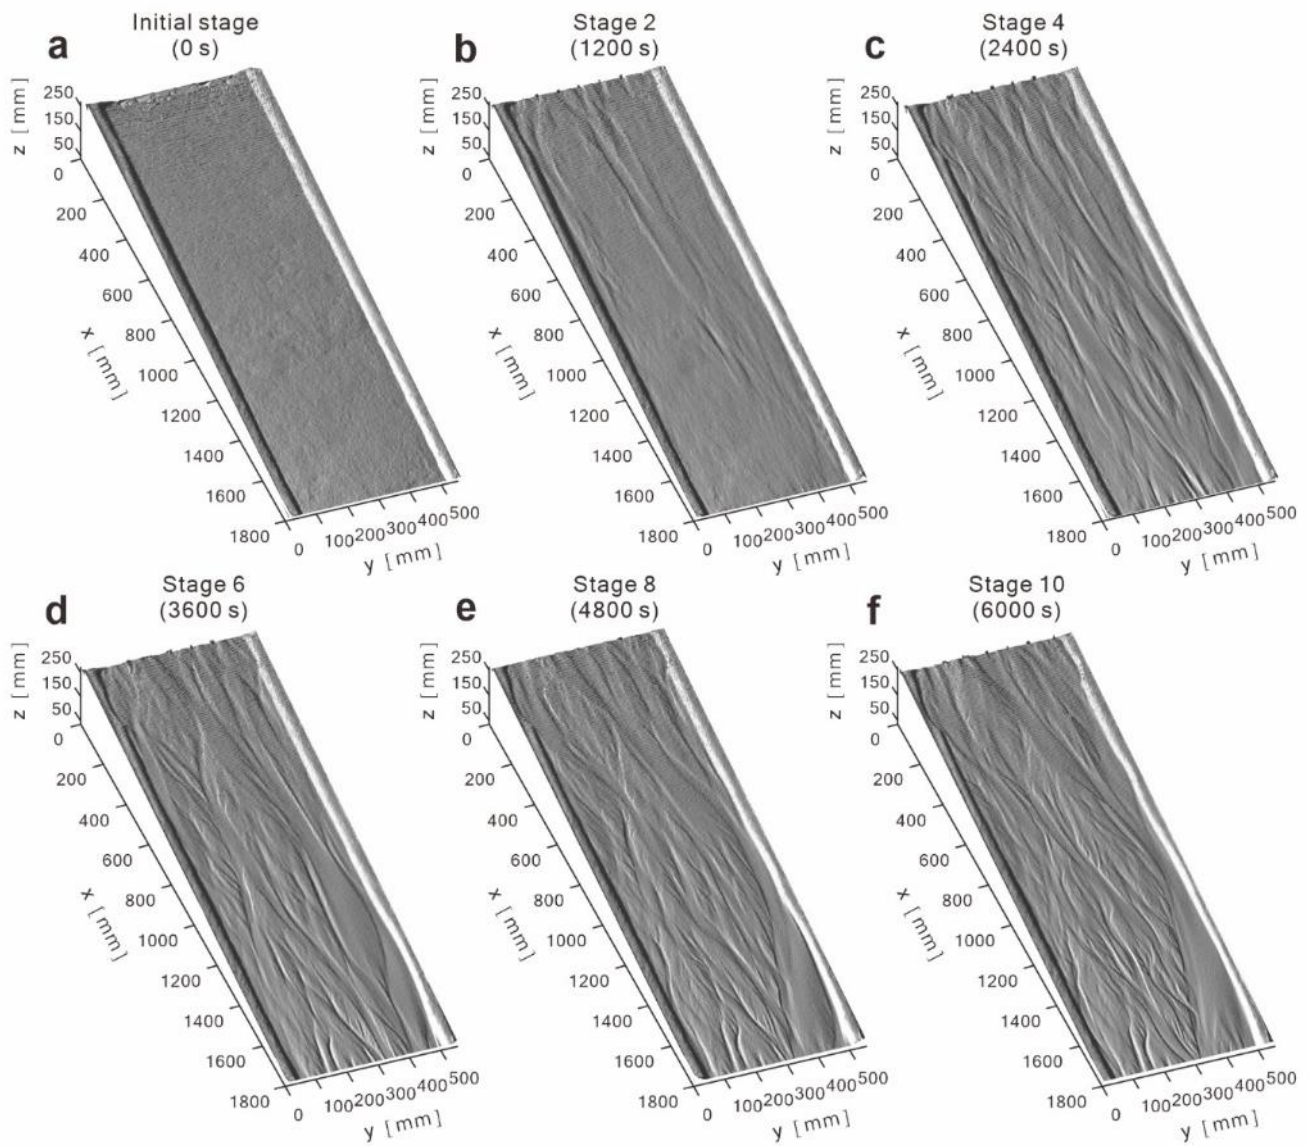

**Figure S10. Hillshaded DEMs of Run B3 from  $t = 0$  to 100 min.**

**Captions for Movie S1 to S6** (Files uploaded separately at: )

**Movie S1.** This film shows the evolution of submarine braided channels of Run A1 from  $t = 0$  to 100 min. The bankfull width is 12 cm. The inflow-to-sediment ratio is around 60.

**Movie S2.** This film shows the evolution of submarine braided channels of Run A2 from  $t = 0$  to 100 min. The bankfull width is 24 cm. The inflow-to-sediment ratio is around 60.

**Movie S3.** This film shows the evolution of submarine braided channels of Run A3 from  $t = 0$  to 100 min. The bankfull width is 48 cm. The inflow-to-sediment ratio is around 60.

**Movie S4.** This film shows the evolution of submarine braided channels of Run B1 from  $t = 0$  to 100 min. The bankfull width is 12 cm. The inflow-to-sediment ratio is around 90.

**Movie S5.** This film shows the evolution of submarine braided channels of Run B2 from  $t = 0$  to 100 min. The bankfull width is 24 cm. The inflow-to-sediment ratio is around 90.

**Movie S6.** This film shows the evolution of submarine braided channels of Run B3 from  $t = 0$  to 100 min. The bankfull width is 48 cm. The inflow-to-sediment ratio is around 90.

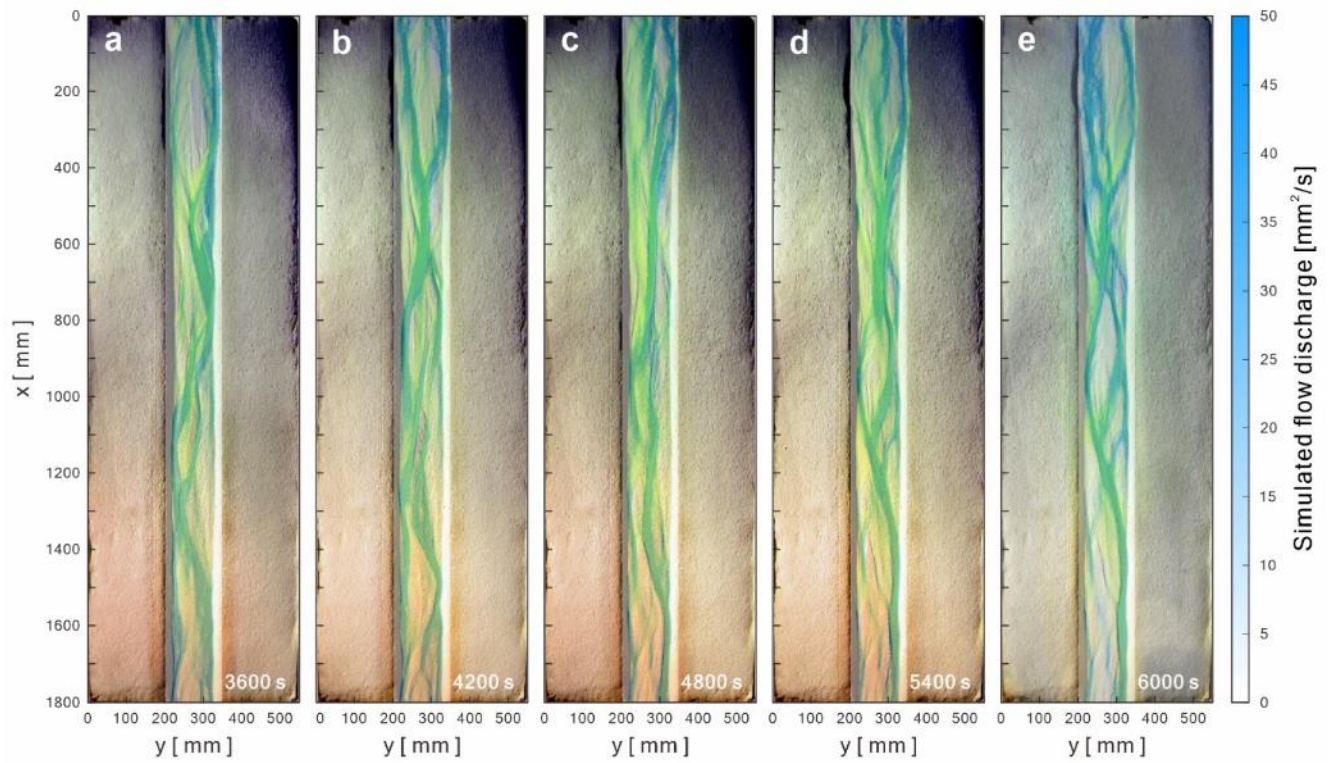

**Figure S11. Comparison between simulated flow pattern and orthophoto of Run A1.**

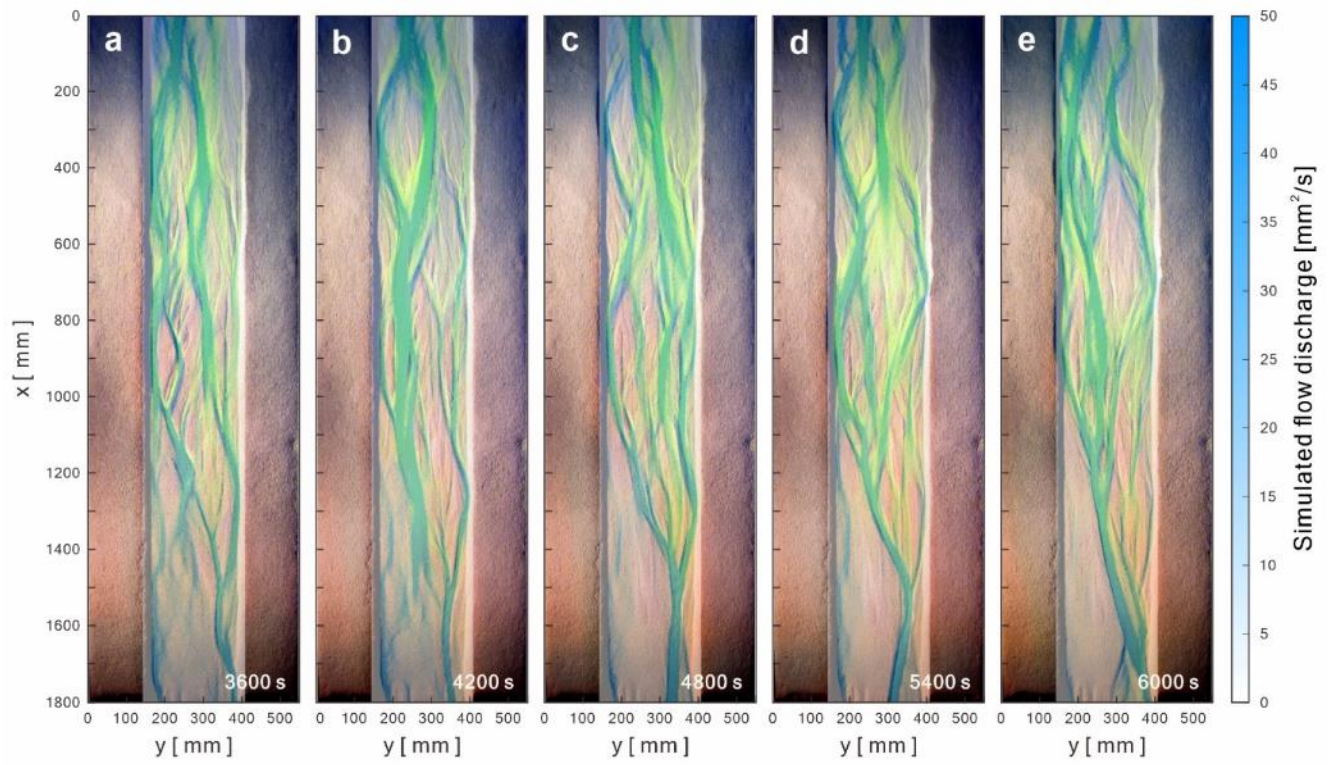

**Figure S12. Comparison between simulated flow pattern and orthophoto of Run A2.**

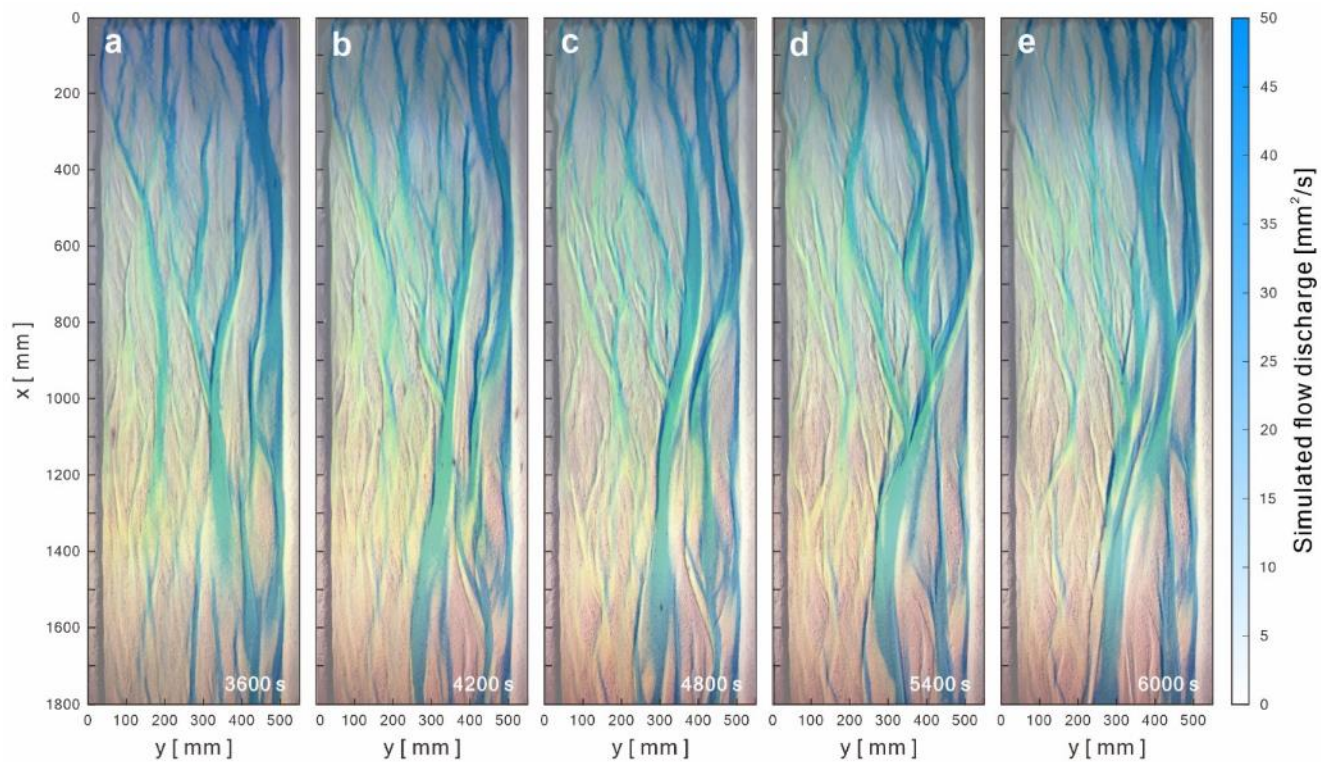

**Figure S13. Comparison between simulated flow pattern and orthophoto of Run A3.**

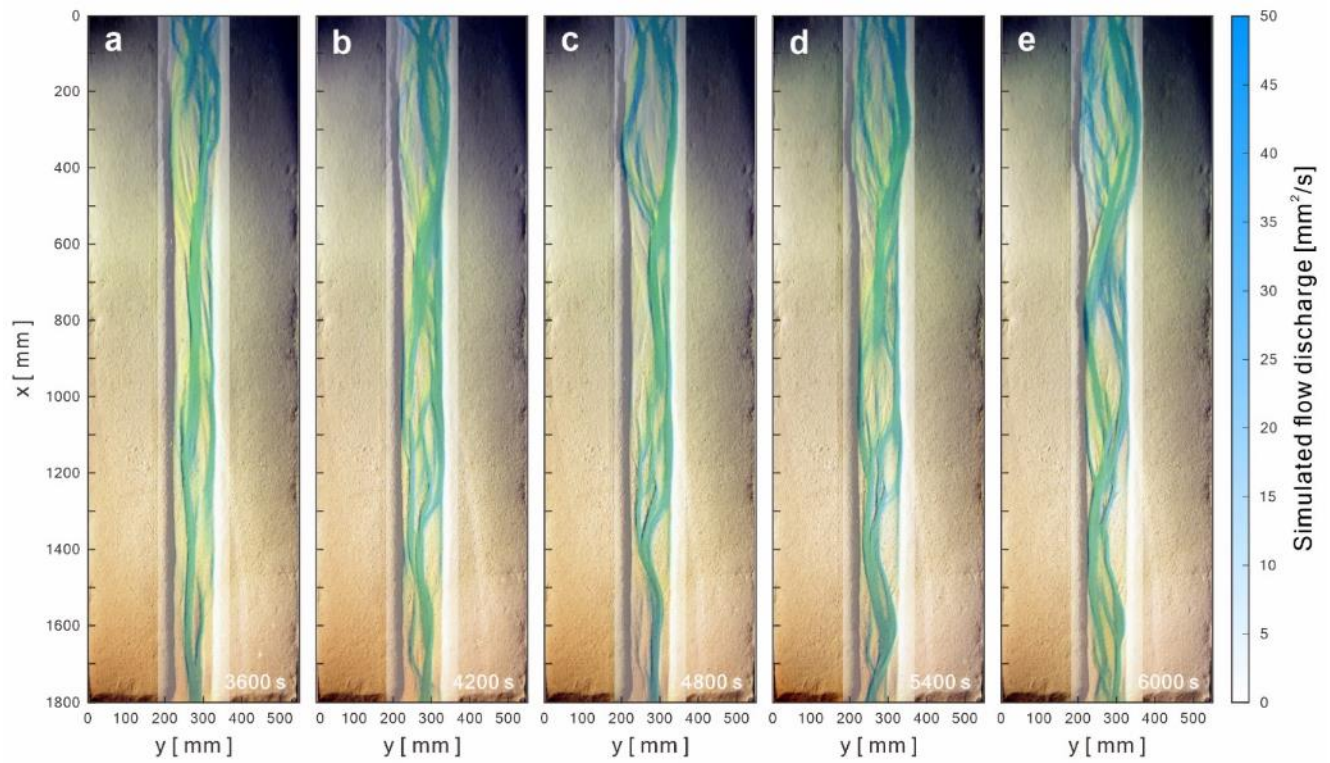

**Figure S14. Comparison between simulated flow pattern and orthophoto of Run B1.**

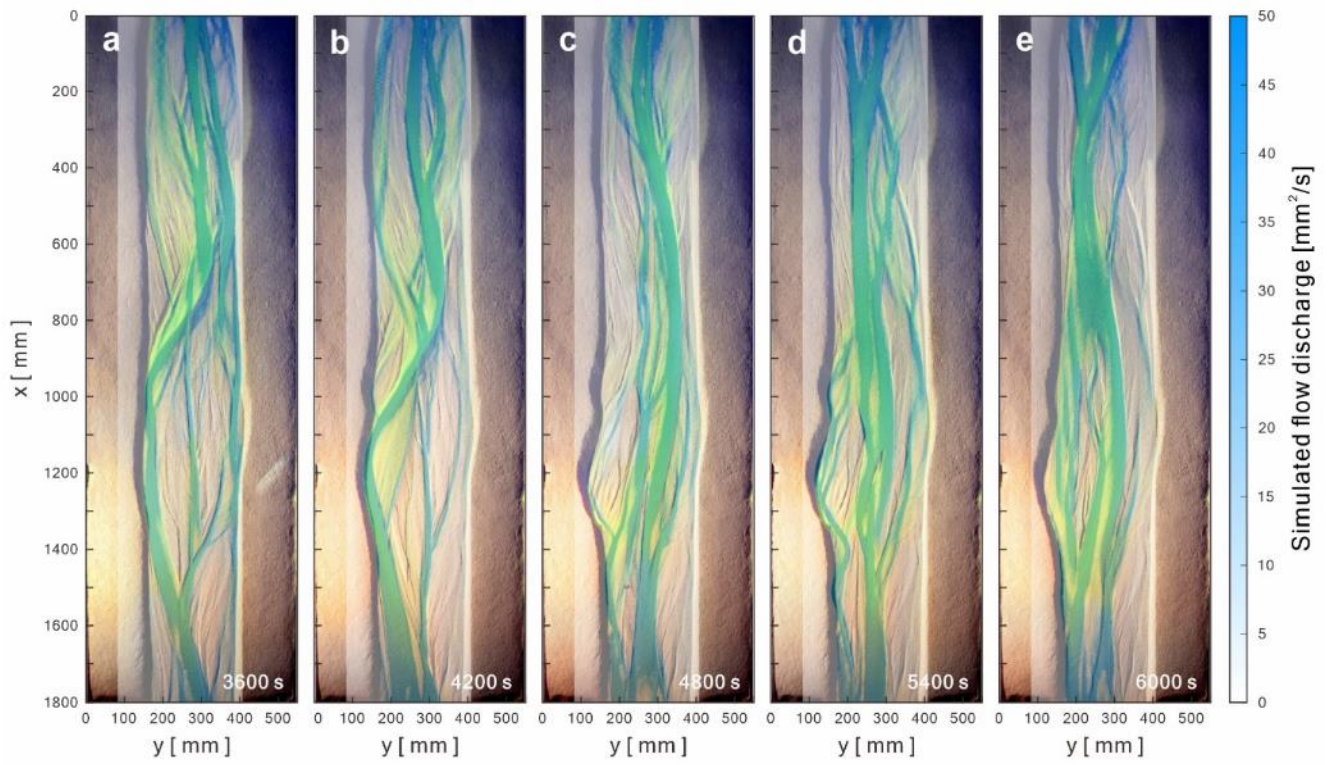

**Figure S15. Comparison between simulated flow pattern and orthophoto of Run B2.**

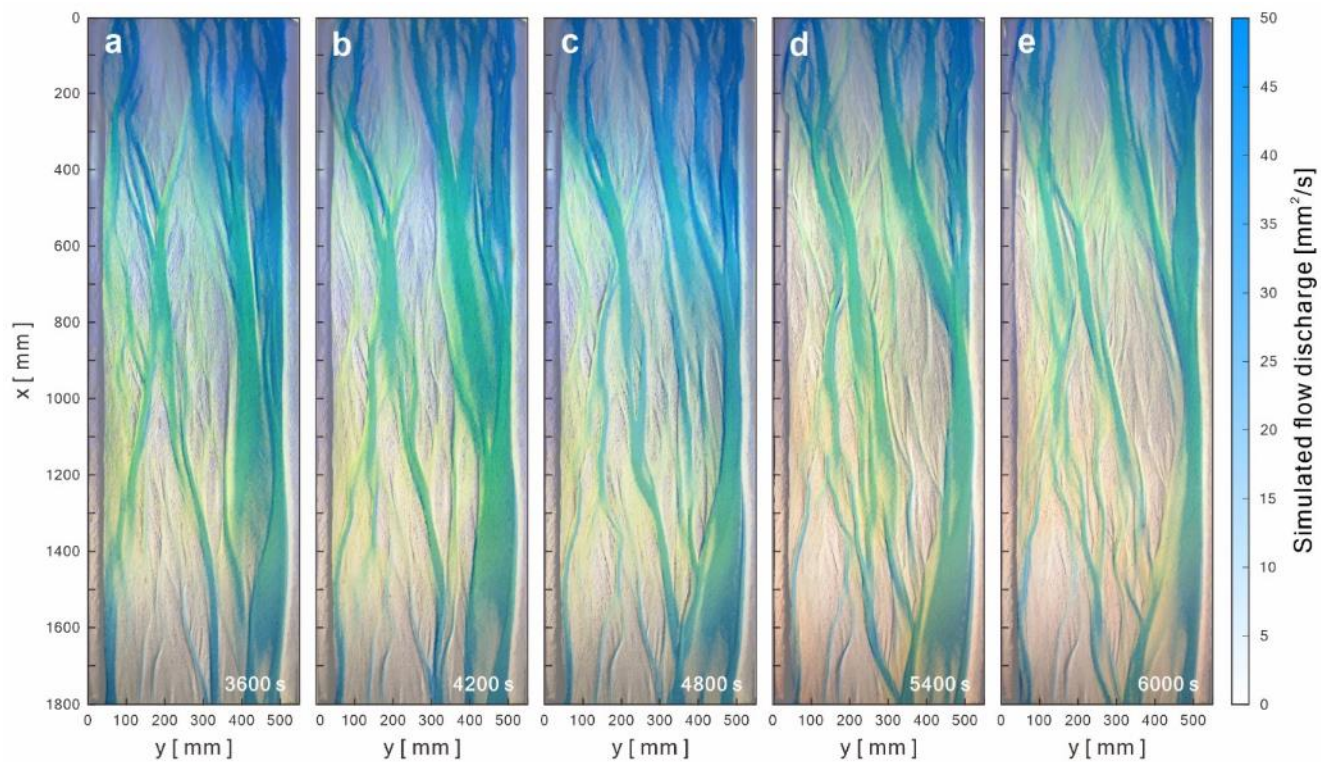

**Figure S16. Comparison between simulated flow pattern and orthophoto of Run B3.**



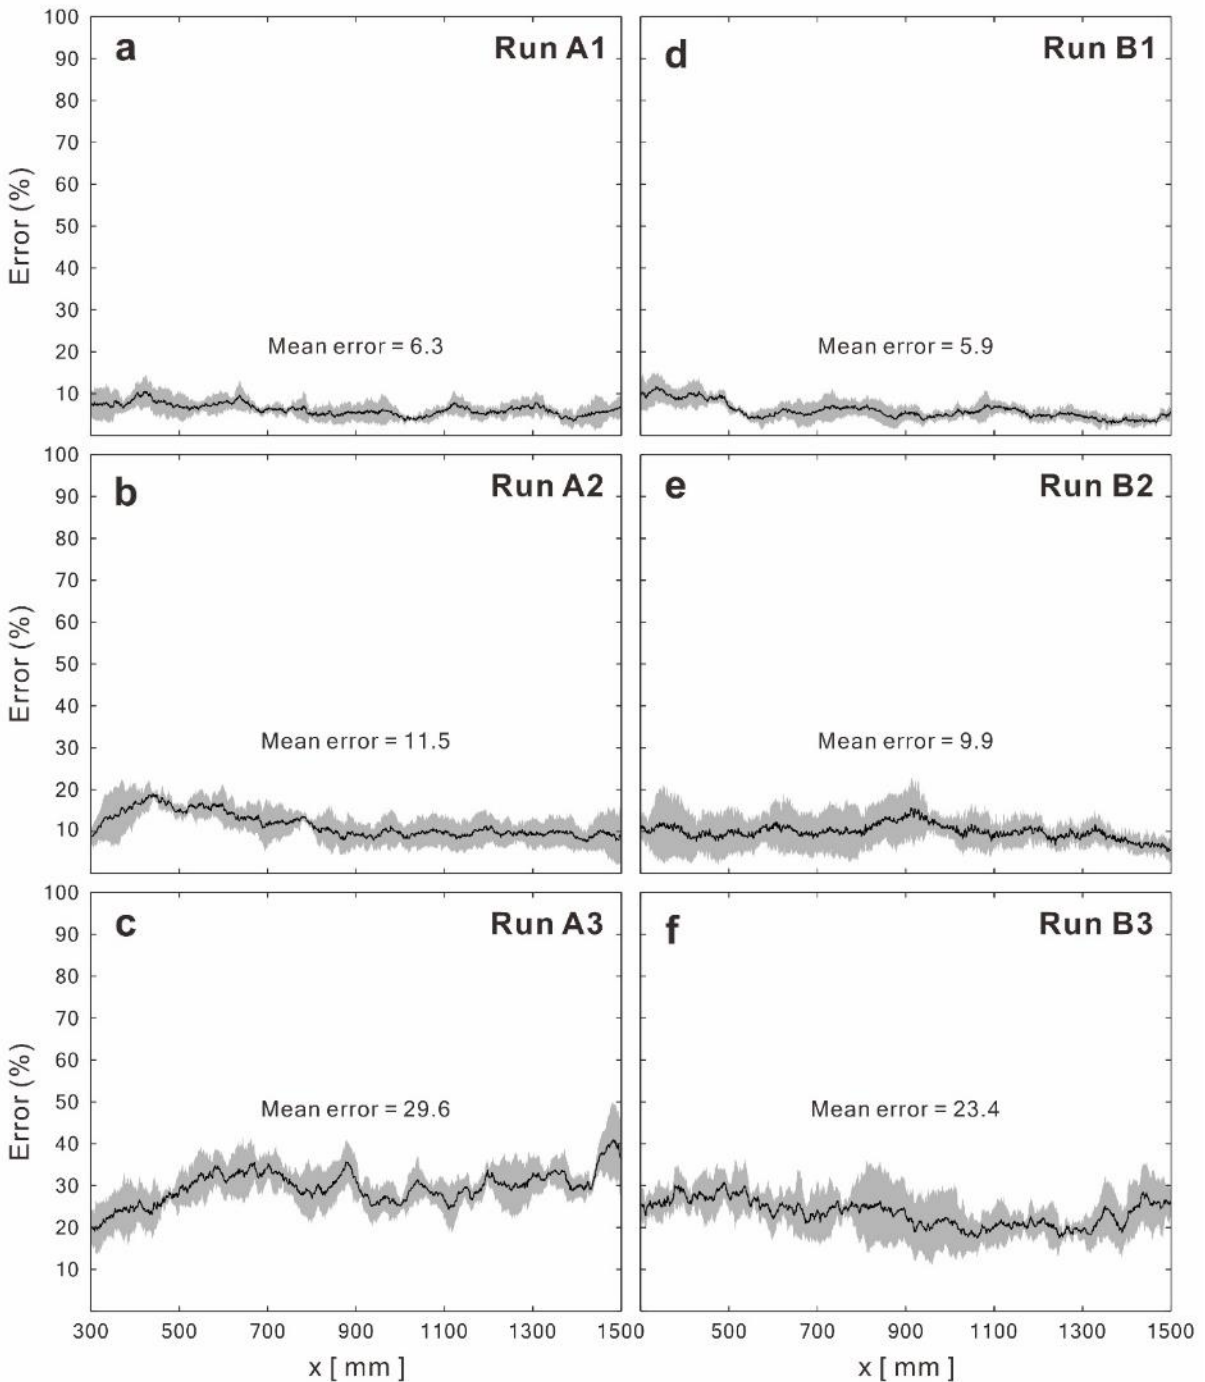

**Figure S17. Error between simulations and experiments. The errors are calculated by overlapping the simulated flows patterns and experimental binarized images from  $x = 300$  to  $1500$  mm, at  $t = 3600$  to  $6000$  s. Black solid lines represent the mean.**

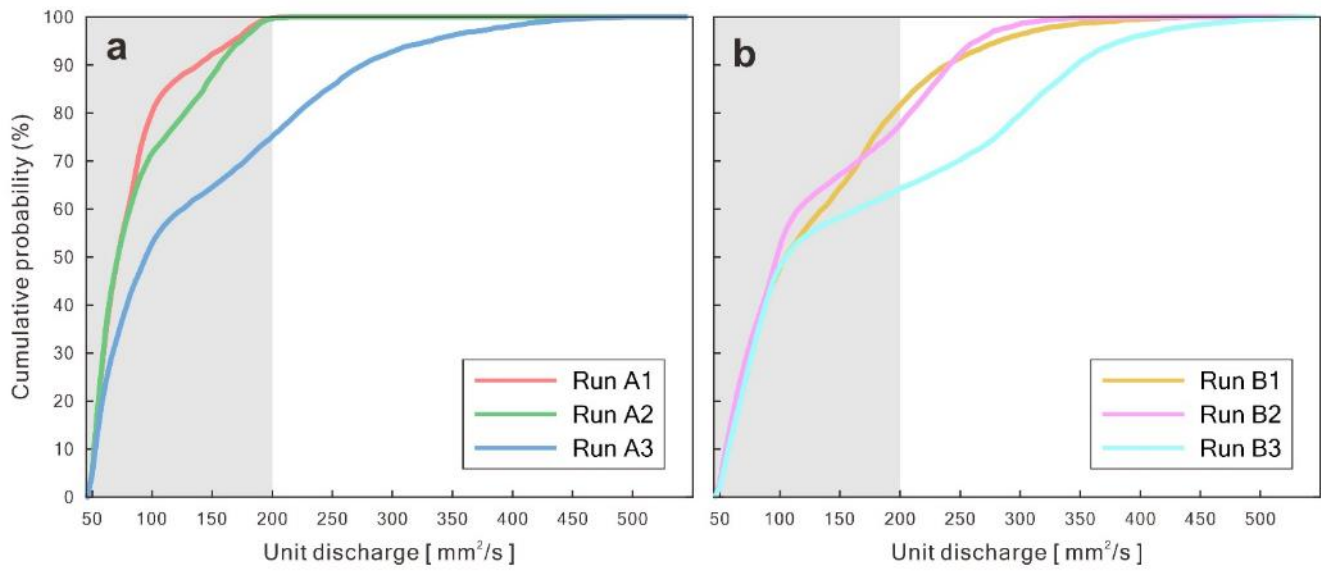

**Figure S18. Cumulative probability of simulated discharge of Series 1 (a) and Series 2 (b).**
